# Supplementary material for: Functional Characterization of a Drought-Responsive Invertase Inhibitor from Maize (Zea mays L.)
Source: PubMed Central journal article supplement (PMC6747265; doi:10.3390/ijms20174081), 2019-08-21
Supplement: ijms-20-04081-s001.pdf [file ijms-20-04081-s001.pdf]

## Supplementary Materials:

**Table S1.** Oligonucleotides used for PCR amplification and cloning. Included are primers for full length constructs (full); partial cDNAs for qPCR (qPCR); for heterologous expression of mature proteins in *E.coli* (pETG10A); for Gateway 2-step PCR (For pETG10A vector *E.coli* expression).

| cDNA                                                   | Comment                       | Primer name                        | Primer sequence (5'-3')                                   |
|--------------------------------------------------------|-------------------------------|------------------------------------|-----------------------------------------------------------|
| Zm-INVINH4                                             | Full gateway<br>+/-Stop codon | Inh4GW-F                           | GGGGACAAGTTTGTACAAAAAAGCAGGCTCCATG<br>GCAGCAACAAGGGCTTC   |
|                                                        |                               | Inh4GW+SC-R                        | GGGGACCACTTTGTACAAGAAAGCTGGGTCTTAG<br>TAGGTCTCCTGGTTTTGCA |
|                                                        |                               | Inh4GW-SC-R                        | GGGGACCACTTTGTACAAGAAAGCTGGGTCTAG<br>GTCTCCTGGTTTTGCA     |
|                                                        | qPCR                          | Inh4qPCR-F                         | GAGCAACAGAACGCCAAGC                                       |
|                                                        |                               | Inh4qPCR-R                         | GCGATGCAGAGGTCGTAGAA                                      |
|                                                        | pETG10A                       | Inh4pETG-F                         | TATTTTCAGGGCTTCCGCCTCCCCGACTCC                            |
| Inh4pETG-R                                             |                               | AGAAAGCTGGGTGCTAGTAGGTCTCCTGGTTTTG |                                                           |
| Zm-INVINH1                                             | Full gateway<br>+/-Stop codon | Inh1GW-F                           | GGGGACAAGTTTGTACAAAAAAGCAGGCTCCATG<br>AAGCTTCTGCAAGCTCTGT |
|                                                        |                               | Inh1GW-R+                          | GGGGACCACTTTGTACAAGAAAGCTGGGTCTTAC<br>AACGCGCCGTTACAGACA  |
|                                                        |                               | Inh1GW-R-                          | GGGGACCACTTTGTACAAGAAAGCTGGGTCCAAC<br>GCGGCCGTTACAGACAGC  |
|                                                        | qPCR                          | Inh1qPCR-F                         | TGTCAGTCAGGCCAGTCAAG                                      |
|                                                        |                               | Inh1qPCR-R                         | AGTAGGCGTAGCCGGTGTGTC                                     |
| Zm-Ivr2                                                | qPCR                          | Ivr2qPCR-F                         | GTTCTACGCGTCCAAGACG                                       |
|                                                        |                               | Ivr2qPCR-R                         | GTTGCTACCCGTCTTGGTG                                       |
| Zm-Ivr3                                                | qPCR                          | Ivr3qPCR-F                         | TCTCCCTCCTCCCATTG                                         |
|                                                        |                               | Ivr3qPCR-R                         | CTCCCTACTCGTACGTG                                         |
| Zm-INCW1                                               | qPCR                          | Incw1qPCR-F                        | GGACCGGTACTACCCCGA                                        |
|                                                        |                               | Incw1qPCR-R                        | GTCCAGCCAGATCTTCCTTG                                      |
| Zm-INCW2                                               | qPCR                          | Incw2qPCR-F                        | TACCAAGTCGTCCCTGAACC                                      |
|                                                        |                               | Incw2qPCR-R                        | TAGACCCTGGAGAGGATGC                                       |
| Zm-INCW5                                               | qPCR                          | Incw5qPCR-F                        | GGAGAGGACCGCCGTGT                                         |
|                                                        |                               | Incw5qPCR-R                        | CGTCCAGAGATGACTTGGTGG                                     |
| Zm-INCW8                                               | qPCR                          | Incw8qPCR-F                        | GGAGGCTGTGGTCAAGGATT                                      |
|                                                        |                               | Incw8qPCR-R                        | ATCCAACCATATAGTCCTGGGAA                                   |
| Zm-ubiquitin                                           | qPCR                          | UbiqPCR-F                          | CTC TTT CCC CAA CCT CGT GTT                               |
|                                                        |                               | UbiqPCR-R                          | ACG AGC GGC GTA CCT TGA                                   |
| Zm-actin                                               | qPCR                          | ActinqPCR-F                        | CGATTGAGCATGGCATTGTCA                                     |
|                                                        |                               | ActinqPCR-R                        | CCCCTAGCGTACAACGAA                                        |
| Gateway 2-step PCR pETG10A<br>vector E.Coli expression |                               | attB1_TEV_adaptor                  | GGGGACAAGTTTGTACAAAAAAGCAGGCTCTGAG<br>AATCTTTATTTTCAGGGC  |
|                                                        |                               | attB2 adaptor                      | GGGGACCACTTTGTACAAGAAAGCTGGGT                             |
